# Supplementary material for: The association of the mitochondrial DNA OriB variant (16184–16193 polycytosine tract) with type 2 diabetes in Europid populations
Source: Springer Nature journal article supplement (doi:10.1007/s00125-013-2945-6), 2013-05-23
Supplement: MOESM1 [file 8091648]

ESM Table 1. Characteristics of 20 genetic association studies contributing to the present meta-analyses

| First author | Reference no. | Year | Location    | Ethnicity | %male in cases | Mean age(SD) in controls | Controls | Genotyping                                | Cases      |             | Controls   |             | No. of cases |
|--------------|---------------|------|-------------|-----------|----------------|--------------------------|----------|-------------------------------------------|------------|-------------|------------|-------------|--------------|
|              |               |      |             |           |                |                          |          |                                           | 16189C (%) | 16189T (%)  | 16189C (%) | 16189T (%)  |              |
| Gill-Randal  | 1             | 2001 | UK          | Western   | NA             | NA                       | Hospital | PCR/RFLP and sequencing                   | 15 (10.0)  | 135 (90.0)  | 10 (6.7)   | 139 (93.3)  | 150          |
| Poulton      | 2             | 2002 | UK          | Western   | NA             | 58.9 (11.0)              | General  | PCR/RFLP and sequencing                   | 2 (15.4)   | 11 (84.6)   | 22 (18.2)  | 99 (81.8)   | 13           |
| Poulton      | 3             | 2002 | UK          | Western   | 64             | 63.0 (8.0)               | General  | PCR/RFLP and sequencing                   | 46 (9.9)   | 417 (90.1)  | 30 (6.4)   | 439 (93.6)  | 463          |
| Mohlke       | 4             | 2005 | US          | Western   | 55.9           | 50.9 (7.5)               | General  | PCR/RFLP                                  | 90 (13.0)  | 602 (87.0)  | 47 (12.7)  | 324 (87.3)  | 692          |
| Chinnery     | 5             | 2005 | UK          | Western   | NA             | NA                       | General  | PCR/RFLP and sequencing                   | 100 (10.1) | 892 (89.9)  | 147 (9.4)  | 1418 (90.6) | 992          |
| Crispim      | 6             | 2006 | Brazil      | Western   | NA             | NA                       | General  | PCR/RFLP and sequencing                   | 24 (23.8)  | 77 (76.2)   | 10 (18.2)  | 45 (81.8)   | 101          |
| Saxena       | 7             | 2006 | US          | Western   | 49.6           | 60.6 (7.2)               | General  | PCR/RFLP                                  | NA         | NA          | NA         | NA          | 3304         |
| Mueller      | 8             | 2011 | Austria     | Western   | 49.7           | 51.5 (6.1)               | General  | multiplex primer extension and sequencing | NA         | NA          | NA         | NA          | 505          |
| NDCCS        | This study    | 2013 | UK          | Western   | 59             | 59.3 (9.3)               | General  | Pyrosequencing and sequencing             | 579 (10.4) | 4320 (77.5) | 675 (9.7)  | 5433 (78.2) | 5574         |
| Ji           | 9             | 2001 | China       | Asian     | 53.5           | 48.0 (9.0)               | General  | PCR/RFLP and sequencing                   | 105 (29.1) | 256 (70.9)  | 31 (20.5)  | 120 (79.5)  | 361          |
| Kim          | 10            | 2002 | South Korea | Asian     | NA             | NA                       | General  | PCR/RFLP and sequencing                   | 8 (29.6)   | 19 (70.4)   | 46 (28.8)  | 114 (71.2)  | 27           |
| Momiyama     | 11            | 2003 | Japan       | Asian     | 64.8           | 63.0 (7.8)               | General  | Sequencing                                | 55 (32.7)  | 113 (67.3)  | 22 (22.0)  | 78 (78.0)   | 168          |
| Shi          | 12            | 2004 | China       | Asian     | 45.3           | 66 (11.0)                | General  | PCR/RFLP                                  | 57 (38.0)  | 93 (62.0)   | 46 (29.1)  | 112 (70.9)  | 150          |
| Ge           | 13            | 2005 | China       | Asian     | 51             | 56.7                     | General  | PCR/RFLP and sequencing                   | 50 (32.3)  | 105 (67.7)  | 25 (15.2)  | 139 (84.8)  | 155          |
| Tang         | 14            | 2006 | China       | Asian     | 61.6           | 60.3 (11.4)              | General  | PCR/RFLP and sequencing                   | 68 (37.0)  | 116 (63.0)  | 80 (28.7)  | 199 (71.3)  | 184          |
| Liou         | 15            | 2007 | Taiwan      | Asian     | 48.7           | 62.8 (8.3)               | Check up | PCR/RFLP and sequencing                   | 229 (38.6) | 365 (61.4)  | 182 (30.7) | 410 (69.3)  | 594          |
| Bhat         | 16            | 2007 | India       | Asian     | 53.2           | 50.8 (9.1)               | General  | PCR/RFLP and sequencing                   | 81 (26.0)  | 231 (74.0)  | 79 (17.0)  | 387 (83.0)  | 312          |
| Park         | 17            | 2008 | South Korea | Asian     | 48.3           | 60.3 (5.7)               | General  | PCR/RFLP and sequencing                   | 872 (35.3) | 1597 (64.7) | 373 (31.0) | 832 (69.0)  | 2469         |
| Liao         | 18            | 2008 | China       | Asian     | NA             | 58.0 (4.0)               | General  | PCR/RFLP and sequencing                   | 34 (47.2)  | 38 (52.8)   | 11 (22.0)  | 39 (78.0)   | 72           |
| Chen         | 19            | 2009 | China       | Asian     | NA             | NA                       | Check up | PCR/RFLP and sequencing                   | 59 (29.7)  | 110 (55.3)  | 58 (28.3)  | 110 (53.7)  | 199          |

NA: not available; 16189C: OriB variant; 16189T: wild type; NDCCS: Norfolk Diabetes Case-Control Study

## Reference:

1. Gill-Randall R, Sherratt EJ, Thomas AW, Gagg JW, Lee A, Alcolado JC. (2001) Analysis of a polycytosine tract and heteroplasmic lengths variation in the mitochondrial DNA D-loop of patients with diabetes, MELAS syndrome and race-matched controls. *Diabet Med* 18:413-416.
2. Poulton J, Bednarz AL, Scott-Brown M, Thompson C, Macaulay VA, Simmons D. (2002) The presence of a common mitochondrial DNA variant is associated with fasting insulin levels in Europeans in Auckland. *Diabet Med* 19: 966-971.
3. Poulton J, Luan J, Macaulay V, Hennings S, Mitchell J, Wareham NJ. (2002) Type 2 diabetes is associated with a common mitochondrial variant: evidence from a population-based case-control study. *Hum Mol Genet* 11: 1581-1583.
4. Mohlke KL, Jackson AU, Scott LJ, et al. (2005) Mitochondrial polymorphisms and susceptibility to type 2 diabetes-related traits in Finns. *Hum Genet* 118:245-254.
5. Chinnery PF, Elliott HR, Patel S, et al. (2005) Role of the mitochondrial DNA 16184-16193 poly-C tract in type 2 diabetes. *Lancet* 366:1650-1651.
6. Crispim D, Fagundes NJR, Roisenberg I. (2006) Role of the mitochondrial m.16189T>C variant in type 2 diabetes mellitus in southern Brazil. *Diabet Res Clin Pract* 74:204-206.
7. Saxena R, de Bakker PIW, Singer K, et al. (2006) Comprehensive association testing of common mitochondrial DNA variation in metabolic disease. *Am J Hum Genet* 79:54-61.
8. Mueller EE, Eder W, Ebner S, et al. (2011) The mitochondrial T16189C polymorphism is associated with coronary artery disease in middle European populations. *PLoS One* 6:e16455.
9. Ji L, Gao L, Han X. (2001) Association of 16189 variant (T->C transition) of mitochondrial DNA with genetic predisposition to type 2 diabetes in Chinese population. *Zhonghua Yi Xue Za Zhi* 81:711-714 [article in Chinese]
10. Kim JH, Park KS, Cho YM, et al. (2002) The prevalence of the mitochondrial DNA 16189 variant in non-diabetic Korean adults and its association with higher fasting glucose and body mass index. *Diabet Med* 19:681-684.
11. Momiyama Y, Furutani M, Suzuki Y, et al. (2003) A mitochondrial DNA variant associated with left ventricular hypertrophy in diabetes. *Biochem and Biophysical Res Communication* 312:858-864.
12. Shi Y, Xiang K, Wu S, Lu G. (2004) Association of mitochondrial DNA 16189 T->C variant with the pathogenesis of type 2 diabetes in Chinese population. *Chin J Diabetes* 12:5-8. [article in Chinese]
13. Ge H, Yang Y, Cai H, Yang G, Liu G. (2005) Variation of mitochondrial DNA 16189T/C in type 2 diabetes. *Chin J Clin Rehabilitation* 9:112-113. [article in Chinese]

14. Tang DL, Zhou X, Li X, Zhao L, Liu F. (2006) Variation of mitochondrial gene and the association with type 2 diabetes mellitus in a Chinese population. *Diabet Res Clin Pract* 73:77-82.
15. Liou CW, Lin TK, Weng HH, et al. (2007) A common mitochondrial DNA variant and increased body mass index as associated factors for development of type 2 diabetes: additive effects of genetic and environmental factors. *J Clin Endocrinol Metab* 92:235-239.
16. Bhat A, Koul A, Sharma S, et al. (2007) The possible role of 10398A and 16189C mtDNA variants in providing susceptibility to T2DM in two North Indian populations: a replicative study. *Hum Genet* 120:821-826.
17. Park KS, Chan JC, Chuang LM, et al. (2008) A mitochondrial DNA variant at position 16189 is associated with type 2 diabetes mellitus in Asians. *Diabetologia* 51:602-608.
18. Liao WQ, Pang Y, Yu CA, Wen JY, Zhang YG, Li XH. (2008) Novel mutations of mitochondrial DNA associated with type 2 diabetes in Chinese Han population. *Tohoku J Exp Med* 215:377-384.
19. Chen F, Yu H, Lin H, Hu C, Hu Y, Lu J. (2009) Association study on the mitochondrial genome region np16181-16193 variation with type 2 diabetes mellitus. *Chin J Med Genet* 26:340-344. [article in Chinese]
