# Supplementary material for: The association of the mitochondrial DNA OriB variant (16184–16193 polycytosine tract) with type 2 diabetes in Europid populations
Source: Springer Nature journal article supplement (doi:10.1007/s00125-013-2945-6), 2013-05-23
Supplement: MOESM2 [file 8091648]

ESM Table 2. Frequency of the mitochondrial DNA OriB variant in the Norfolk Diabetes Case-Control Study

| Sequence               | OriB variant        | Cases | Case frequency(%) | Controls | Control frequency(%) |
|------------------------|---------------------|-------|-------------------|----------|----------------------|
| CCCCTCCCCAAAACACTAC    | Wild type           | 4,320 | 77.5              | 5,433    | 78.17                |
| CCCCCCCCAAAACACTAC     | 10 poly C tract     | 270   | 4.84              | 305      | 4.39                 |
| CCCCCCCCAAAACACTAC     | 11 poly C tract     | 196   | 3.52              | 243      | 3.5                  |
| CCCCCCCCAAAACACTAC     | 12 poly C tract     | 71    | 1.27              | 91       | 1.31                 |
| CCCCCCCCAAAACACTAC     | 13 poly C tract     | 3     | 0.05              | 1        | 0.01                 |
|                        | 10-13 poly C tract* | 39    | 0.7               | 35       | 0.5                  |
| CCCCTCCCCGAAAACACTAC   | Other variant 1     | 0     | 0                 | 2        | 0.03                 |
| CCCCTCCCTCAAAAACACTAC  | Other variant 2     | 9     | 0.16              | 8        | 0.12                 |
| CCCCTTCCCCAAAACACTAC   | Other variant 3     | 14    | 0.25              | 9        | 0.13                 |
| TCCCTCCCCAAAACACTAC    | Other variant 4     | 66    | 1.18              | 74       | 1.06                 |
| CCCCCCCCTCAAAAACACTAC  | Other variant 5     | 2     | 0.04              | 3        | 0.04                 |
| CCCCCTCCCAAAAACACTAC   | Other variant 6     | 20    | 0.36              | 18       | 0.26                 |
| CCCCCTCCCCAAAACACTAC   | Other variant 7     | 45    | 0.81              | 63       | 0.91                 |
| CCCTCCCCAAAACACTAC     | Other variant 8     | 20    | 0.36              | 36       | 0.52                 |
| CCTCCCCAAAACACTAC      | Other variant 9     | 13    | 0.23              | 12       | 0.17                 |
| CCCCCCTCAAAAACACTAC    | Other variant 10    | 118   | 2.12              | 139      | 2                    |
| TCCCCCCCCAAAACACTAC    | Other variant 11    | 0     | 0                 | 1        | 0.01                 |
| CTCCCCCCCCAAAACACTAC   | Other variant 12    | 58    | 1.04              | 64       | 0.92                 |
| CTCCCTCCCCAAAACACTAC   | Other variant 13    | 9     | 0.16              | 11       | 0.16                 |
| CCCCTCCTCAAAAACACTAC   | Other variant 14    | 9     | 0.16              | 12       | 0.17                 |
| CTCTCCCCAAAACACTAC     | Other variant 15    | 255   | 4.57              | 359      | 5.17                 |
| CTCCCCCTCCCAAAAACACTAC | Other variant 16    | 11    | 0.2               | 11       | 0.16                 |
| CCCCTCCCCTAAAACACTAC   | Other variant 17    | 12    | 0.22              | 9        | 0.13                 |
| CCCCTCTCCCAAAAACACTAC  | Other variant 18    | 6     | 0.11              | 10       | 0.14                 |
| CCTCCCTCCCCAAAACACTAC  | Other variant 19    | 3     | 0.05              | 1        | 0.01                 |
| CTCTCCTCCCCAAAACACTAC  | Other variant 20    | 2     | 0.04              | 0        | 0                    |
| CTCCCTCCCAAAAACACTAC   | Other variant 21    | 3     | 0.05              | 0        | 0                    |

\*: Some 10-13 poly C tract cannot be clearly separated.
