# Supplementary material for: The association of the mitochondrial DNA OriB variant (16184–16193 polycytosine tract) with type 2 diabetes in Europid populations
Source: Springer Nature journal article supplement (doi:10.1007/s00125-013-2945-6), 2013-05-23
Supplement: MOESM3 [file 8091648]

ESM Table 3. The association of the mitochondrial DNA OriB variant and T2D risk in the Norfolk Diabetes Case-Control Study

| OriB variant            | No. of cases (%) | No. of controls (%) | OR (95% CI)        | P-value |
|-------------------------|------------------|---------------------|--------------------|---------|
| Wild type (n)           | 4,320 (77.5)     | 5,433 (78.2)        | reference          |         |
| 10 poly C tract (n)     | 270 (4.8)        | 305 (4.4)           | 1.13 (0.94, 1.36)  | 0.20    |
| 11 poly C tract (n)     | 196 (3.5)        | 243 (3.5)           | 1.03 (0.84, 1.27)  | 0.77    |
| 12 poly C tract (n)     | 71 (1.3)         | 91 (1.3)            | 0.91 (0.65, 1.29)  | 0.65    |
| 13 poly C tract (n)     | 3 (0.05)         | 1 (0.01)            | 4.97 (0.45, 55.55) | 0.19    |
| 10-13 poly C tract (n)* | 39 (0.7)         | 35 (0.5)            | 1.52 (0.92-2.48)   | 0.10    |
| Total Poly C tract (n)  | 579 (10.4)       | 675 (9.7)           | 1.09 (0.96, 1.24)  | 0.20    |
| Other variants (n)      | 675 (12.1)       | 842 (12.1)          | 1.05 (0.93, 1.18)  | 0.43    |

Adjusted by age, sex, and body mass index; \*: Some 10-13 poly C tract cannot be clearly separated.
