# Supplementary material for: The association of the mitochondrial DNA OriB variant (16184–16193 polycytosine tract) with type 2 diabetes in Europid populations
Source: Springer Nature journal article supplement (doi:10.1007/s00125-013-2945-6), 2013-05-23
Supplement: MOESM4 [file 8091648]

ESM Fig. 1. The association of the mitochondrial DNA OriB variant with type 2 diabetes in Asian populations

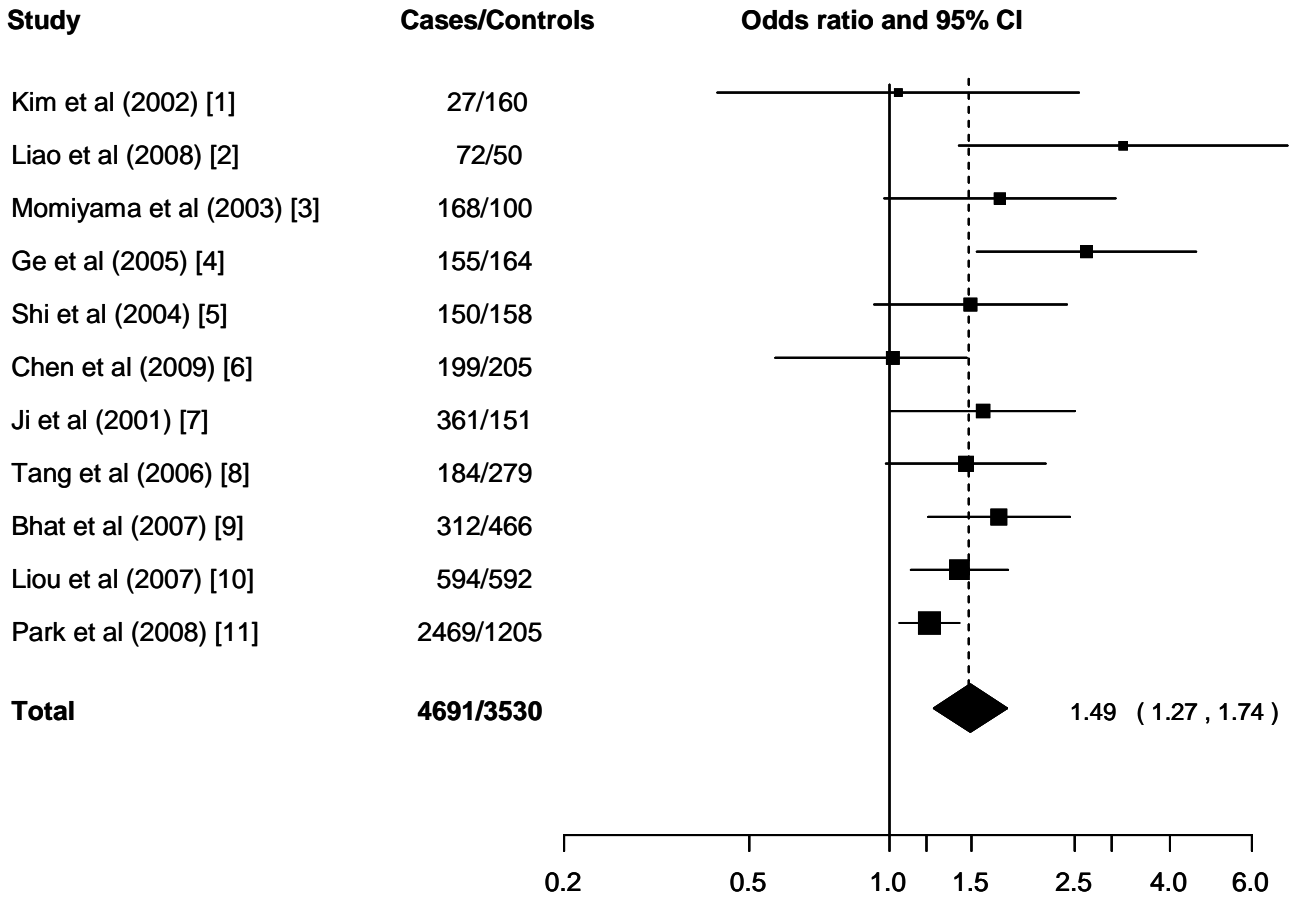

## Reference:

1. Kim JH, Park KS, Cho YM, et al. (2002) The prevalence of the mitochondrial DNA 16189 variant in non-diabetic Korean adults and its association with higher fasting glucose and body mass index. *Diabet Med* 19:681-684.
2. Liao WQ, Pang Y, Yu CA, Wen JY, Zhang YG, Li XH. (2008) Novel mutations of mitochondrial DNA associated with type 2 diabetes in Chinese Han population. *Tohoku J Exp Med* 215:377-384.
3. Momiyama Y, Furutani M, Suzuki Y, et al. (2003) A mitochondrial DNA variant associated with left ventricular hypertrophy in diabetes. *Biochem and Biophysical Res Communication* 312:858-864.
4. Ge H, Yang Y, Cai H, Yang G, Liu G. (2005) Variation of mitochondrial DNA 16189T/C in type 2 diabetes. *Chin J Clin Rehabilitation* 9:112-113. [article in Chinese]
5. Shi Y, Xiang K, Wu S, Lu G. (2004) Association of mitochondrial DNA 16189 T->C variant with the pathogenesis of type 2 diabetes in Chinese population. *Chin J Diabetes* 12:5-8. [article in Chinese]
6. Chen F, Yu H, Lin H, Hu C, Hu Y, Lu J. (2009) Association study on the mitochondrial genome region np16181-16193 variation with type 2 diabetes mellitus. *Chin J Med Genet* 26:340-344. [article in Chinese]
7. Ji L, Gao L, Han X. (2001) Association of 16189 variant (T->C transition) of mitochondrial DNA with genetic predisposition to type 2 diabetes in Chinese population. *Zhonghua Yi Xue Za Zhi* 81:711-714 [article in Chinese]
8. Tang DL, Zhou X, Li X, Zhao L, Liu F. (2006) Variation of mitochondrial gene and the association with type 2 diabetes mellitus in a Chinese population. *Diabet Res Clin Pract* 73:77-82.
9. Bhat A, Koul A, Sharma S, et al. (2007) The possible role of 10398A and 16189C mtDNA variants in providing susceptibility to T2DM in two North Indian populations: a replicative study. *Hum Genet* 120:821-826.
10. Liou CW, Lin TK, Weng HH, et al. (2007) A common mitochondrial DNA variant and increased body mass index as associated factors for development of type 2 diabetes: additive effects of genetic and environmental factors. *J Clin Endocrinol Metab* 92:235-239.
11. Park KS, Chan JC, Chuang LM, et al. (2008) A mitochondrial DNA variant at position 16189 is associated with type 2 diabetes mellitus in Asians. *Diabetologia* 51:602-608.
